# Supplementary material
Source: Research Square preprint supplement (doi:10.21203/rs.3.rs-9220691/v1)
Supplement: Supplementary file 1 [file f625a6bb50ca0108c7fd3e4d.xlsx]

## Sheet: Table S1
Table S1 Population size of cycles C1, C2 and C3 within each Replicate (R1 & R2), as well as the training set C0 and the parents of C1 for each replicate (C0sel).
Replicate	C0	C0sel	C1	C2	C3
R1	402	10	168	168	114
R2	8	159	160	87

## Sheet: Table S2
Table S3:GO enrichment analysis results for R1. The significant results based on a Fisher's test (p < 0.05) are given. The column GO.ID provides each Gos unique identifier, the column Term provides the description of each GO, the column Annotated gives the total number of genes in our maize dataset being part of this GO category, the column Significant shows the number of genes in the selected wi…
GO.ID	Term	Annotated	Significant	Expected	pvalue
GO:0043650	dicarboxylic acid biosynthetic process	89	4	0.38	0.00059
GO:0048283	indeterminate inflorescence morphogenesis	11	2	0.05	0.00097
GO:0016094	polyprenol biosynthetic process	22	2	0.09	0.00394
GO:0010304	PSII associated light-harvesting complex II catabolic process	1	1	0	0.00426
GO:0002939	tRNA N1-guanine methylation	1	1	0	0.00426
GO:0007020	microtubule nucleation	28	2	0.12	0.00634
GO:0015712	hexose phosphate transport	2	1	0.01	0.0085
GO:0097339	glycolate transmembrane transport	2	1	0.01	0.0085
GO:0090481	pyrimidine nucleotide-sugar transmembrane transport	105	3	0.45	0.01037
GO:0009723	response to ethylene	202	4	0.86	0.01117
GO:0009423	chorismate biosynthetic process	39	2	0.17	0.01206
GO:0120009	intermembrane lipid transfer	39	2	0.17	0.01206
GO:1990569	UDP-N-acetylglucosamine transmembrane transport	3	1	0.01	0.01273
GO:0015787	UDP-glucuronic acid transmembrane transport	3	1	0.01	0.01273
GO:0015789	UDP-N-acetylgalactosamine transmembrane transport	3	1	0.01	0.01273
GO:1901975	glycerate transmembrane transport	3	1	0.01	0.01273
GO:0015780	nucleotide-sugar transmembrane transport	124	3	0.53	0.01619
GO:0010448	vegetative meristem growth	4	1	0.02	0.01694
GO:0006820	anion transport	484	7	2.06	0.01721
GO:0046417	chorismate metabolic process	49	2	0.21	0.01862
GO:2000142	regulation of DNA-templated transcription initiation	49	2	0.21	0.01862
GO:0006558	L-phenylalanine metabolic process	51	2	0.22	0.02008
GO:0010262	somatic embryogenesis	5	1	0.02	0.02113
GO:0009052	pentose-phosphate shunt	5	1	0.02	0.02113
GO:0042256	mature ribosome assembly	5	1	0.02	0.02113
GO:0090329	regulation of DNA-dependent DNA replication	55	2	0.23	0.02313
GO:0050821	protein stabilization	56	2	0.24	0.02392
GO:0030150	protein import into mitochondrial matrix	57	2	0.24	0.02472
GO:0032515	negative regulation of phosphoprotein phosphatase activity details	6	1	0.03	0.0253
GO:0018026	peptidyl-lysine monomethylation	6	1	0.03	0.0253
GO:0031099	regeneration	6	1	0.03	0.0253
GO:0009873	ethylene-activated signaling pathway	152	3	0.65	0.02749
GO:0006457	protein folding	538	6	2.29	0.02831
GO:0031647	regulation of protein stability	62	2	0.26	0.02889
GO:0006275	regulation of DNA replication	62	2	0.26	0.02889
GO:0007095	mitotic G2 DNA damage checkpoint signaling	7	1	0.03	0.02945
GO:0010338	leaf formation	7	1	0.03	0.02945
GO:0032988	ribonucleoprotein complex disassembly	7	1	0.03	0.02945
GO:0071369	cellular response to ethylene stimulus	158	3	0.67	0.03034
GO:2000242	negative regulation of reproductive process	66	2	0.28	0.03241
GO:1902221	erythrose 4-phosphate/phosphoenolpyruvate family amino acid metabolic process	67	2	0.29	0.03331
GO:0042631	cellular response to water deprivation	8	1	0.03	0.03359
GO:0032876	negative regulation of DNA endoreduplication	8	1	0.03	0.03359
GO:0071462	cellular response to water stimulus	8	1	0.03	0.03359
GO:0140547	acquisition of seed longevity	8	1	0.03	0.03359
GO:0006811	ion transport	1579	13	6.73	0.03672
GO:0009249	protein lipoylation	9	1	0.04	0.03771
GO:1900057	positive regulation of leaf senescence	9	1	0.04	0.03771
GO:0055062	phosphate ion homeostasis	9	1	0.04	0.03771
GO:0043970	histone H3-K9 acetylation	9	1	0.04	0.03771
GO:0048581	negative regulation of post-embryonic development	75	2	0.32	0.0409
GO:0042873	aldonate transmembrane transport	10	1	0.04	0.04181
GO:0034219	carbohydrate transmembrane transport	79	2	0.34	0.04492
GO:0006597	spermine biosynthetic process	11	1	0.05	0.04589
GO:0019632	shikimate metabolic process	11	1	0.05	0.04589
GO:0071229	cellular response to acid chemical	11	1	0.05	0.04589
GO:0006557	S-adenosylmethioninamine biosynthetic process	11	1	0.05	0.04589
GO:0046499	S-adenosylmethioninamine metabolic process	11	1	0.05	0.04589
GO:0015914	phospholipid transport	80	2	0.34	0.04594
GO:0009699	phenylpropanoid biosynthetic process	82	2	0.35	0.04802
GO:0051601	exocyst localization	12	1	0.05	0.04996
GO:0019877	diaminopimelate biosynthetic process	12	1	0.05	0.04996

## Sheet: Table S3
Table S3:GO enrichment analysis results for R2. The significant results based on a Fisher's test (p < 0.05) are given. The column GO.ID provides each Gos unique identifier, the column Term provides the description of each GO, the column Annotated gives the total number of genes in our maize dataset being part of this GO category, the column Significant shows the number of genes in the selected wi…
GO.ID	Term	Annotated	Significant	Expected	pvalue
GO:0016125	sterol metabolic process	165	4	0.57	0.0026
GO:0009791	post-embryonic development	1406	12	4.84	0.0035
GO:0015712	hexose phosphate transport	2	1	0.01	0.0069
GO:0032006	regulation of TOR signaling	2	1	0.01	0.0069
GO:1901617	organic hydroxy compound biosynthetic process	368	5	1.27	0.0091
GO:0006400	tRNA modification	238	4	0.82	0.0094
GO:0090071	negative regulation of ribosome biogenesis	3	1	0.01	0.0103
GO:0009788	negative regulation of abscisic acid-activated signaling pathway	48	2	0.17	0.0119
GO:1901420	negative regulation of response to alcoholol	48	2	0.17	0.0119
GO:1905958	negative regulation of cellular response to alcohol	48	2	0.17	0.0119
GO:0010381	peroxisome-chloroplast membrane tethering	4	1	0.01	0.0137
GO:0048608	reproductive structure development	1098	9	3.78	0.0139
GO:0061458	reproductive system development	1099	9	3.78	0.014
GO:0043094	cellular metabolic compound salvage	147	3	0.51	0.0144
GO:0090698	post-embryonic plant morphogenesis	154	3	0.53	0.0163
GO:0048446	petal morphogenesis	5	1	0.02	0.0171
GO:0090069	regulation of ribosome biogenesis	5	1	0.02	0.0171
GO:0006606	protein import into nucleus	60	2	0.21	0.0182
GO:0006694	steroid biosynthetic process	162	3	0.56	0.0186
GO:0010182	sugar mediated signaling pathway	6	1	0.02	0.0205
GO:0009756	carbohydrate mediated signaling	6	1	0.02	0.0205
GO:0048580	regulation of post-embryonic development	303	4	1.04	0.021
GO:2000026	regulation of multicellular organismal development	305	4	1.05	0.0214
GO:2000242	negative regulation of reproductive process	66	2	0.23	0.0218
GO:0046070	dGTP metabolic process	7	1	0.02	0.0238
GO:0009151	purine deoxyribonucleotide metabolic process	7	1	0.02	0.0238
GO:0009155	purine deoxyribonucleotide catabolic process	7	1	0.02	0.0238
GO:0009146	purine nucleoside triphosphate catabolic process	7	1	0.02	0.0238
GO:0009215	purine deoxyribonucleoside triphosphate metabolic process	7	1	0.02	0.0238
GO:0009217	purine deoxyribonucleoside triphosphate catabolic process	7	1	0.02	0.0238
GO:0006203	dGTP catabolic process	7	1	0.02	0.0238
GO:0006438	valyl-tRNA aminoacylation	7	1	0.02	0.0238
GO:0048586	regulation of long-day photoperiodism	71	2	0.24	0.0238
GO:0016126	sterol biosynthetic process	74	2	0.25	0.027
GO:0009403	toxin biosynthetic process	8	1	0.03	0.0272
GO:0009700	indole phytoalexin biosynthetic process	8	1	0.03	0.0272
GO:0032447	protein urmylation	8	1	0.03	0.0272
GO:0046217	indole phytoalexin metabolic process	8	1	0.03	0.0272
GO:0140547	acquisition of seed longevity	8	1	0.03	0.0272
GO:0052315	phytoalexin biosynthetic process	8	1	0.03	0.0272
GO:0052317	camalexin metabolic process	8	1	0.03	0.0272
GO:0080136	priming of cellular response to stress	8	1	0.03	0.0272
GO:0032264	IMP salvage	8	1	0.03	0.0272
GO:0003006	developmental process involved in reproduction	1236	9	4.25	0.0274
GO:0048581	negative regulation of post-embryonic development	75	2	0.26	0.0277
GO:0055062	phosphate ion homeostasis	9	1	0.03	0.0305
GO:0048571	long-day photoperiodism	80	2	0.28	0.0312
GO:0048574	long-day photoperiodism, flowering	80	2	0.28	0.0312
GO:0070898	RNA polymerase III preinitiation complex assembly	10	1	0.03	0.0339
GO:0009787	regulation of abscisic acid-activated signaling pathway	88	2	0.3	0.0371
GO:1901419	regulation of response to alcohol	88	2	0.3	0.0371
GO:1905957	regulation of cellular response to alcohol	88	2	0.3	0.0371
GO:0009443	pyridoxal 5'-phosphate salvage	11	1	0.04	0.0372
GO:0050826	response to freezing	11	1	0.04	0.0372
GO:0006195	purine nucleotide catabolic process	11	1	0.04	0.0372
GO:0009404	toxin metabolic process	11	1	0.04	0.0372
GO:0046386	deoxyribose phosphate catabolic process	11	1	0.04	0.0372
GO:0052314	phytoalexin metabolic process	11	1	0.04	0.0372
GO:0048281	inflorescence morphogenesis	11	1	0.04	0.0372
GO:0048283	indeterminate inflorescence morphogenesis	11	1	0.04	0.0372
GO:0030488	tRNA methylation	91	2	0.31	0.0394
GO:0042814	monopolar cell growth	12	1	0.04	0.0405
GO:0009204	deoxyribonucleoside triphosphate catabolic process	12	1	0.04	0.0405
GO:0051513	regulation of monopolar cell growth	12	1	0.04	0.0405
GO:0051239	regulation of multicellular organismal process	374	4	1.29	0.0407
GO:0051170	import into nucleus	94	2	0.32	0.0418
GO:0017038	protein import	224	3	0.77	0.0425
GO:0034440	lipid oxidation	95	2	0.33	0.0426
GO:0032196	transposition	13	1	0.04	0.0438
GO:0051510	regulation of unidimensional cell growth	13	1	0.04	0.0438
GO:0048585	negative regulation of response to stimulus	228	3	0.78	0.0444
GO:0051241	negative regulation of multicellular organisms	98	2	0.34	0.045
GO:0090697	post-embryonic plant organ morphogenesis	100	2	0.34	0.0467
GO:0048465	corolla development	14	1	0.05	0.0471
GO:0048441	petal development	14	1	0.05	0.0471
GO:0009264	deoxyribonucleotide catabolic process	14	1	0.05	0.0471
GO:0080175	phragmoplast microtubule organization	14	1	0.05	0.0471
GO:0071322	cellular response to carbohydrate stimulus	14	1	0.05	0.0471
GO:0072506	trivalent inorganic anion homeostasis	14	1	0.05	0.0471
